# Supplementary material for: Climate change will affect global water availability through compounding changes in seasonal precipitation and evaporation
Source: PubMed Central journal article supplement (PMC7311549; doi:10.1038/s41467-020-16757-w), 2020-06-23
Supplement: 41467_2020_16757_MOESM1_ESM.pdf [file 41467_2020_16757_MOESM1_ESM.pdf]

Supporting Information

**Climate Change Will Affect Global Water Availability through Joint Changes in  
Seasonal Precipitation and Evaporation**

Konapala et al.

**Supplementary Table 1:** GCM models used for analysis (Only r1i1p1 realizations are selected among these models)

| <b>GCM Model</b> | <b>Hist</b> | <b>RCP 8.5</b> | <b>RCP 4.5</b> | <b>RCP 2.6</b> |
|------------------|-------------|----------------|----------------|----------------|
| bcc-csm1-1       | ✓           | ✓              | ✓              | ✓              |
| bcc-csm1-1-m     | ✓           | ✓              | ✓              | ✓              |
| BNU-ESM          | ✓           | ✓              | ✓              | ✓              |
| CanESM2          | ✓           | ✓              | ✓              | ✓              |
| CCSM4            | ✓           | ✓              | ✓              | ✓              |
| CESM1-CAM5       | ✓           | ✓              | ✓              | ✓              |
| CNRM-CM5         | ✓           | ✓              | ✓              | ✓              |
| CSIRO-Mk3-6-0    | ✓           | ✓              | ✓              | ✓              |
| FIO-ESM          | ✓           | ✓              | ✓              | ✓              |
| GISS-E2-H        | ✓           | ✓              | ✓              | ✓              |
| HADGEM2-ES       | ✓           | ✓              | ✓              | ✓              |
| IPSL-CM5A-LR     | ✓           | ✓              | ✓              | ✓              |
| IPSL-CM5A-MR     | ✓           | ✓              | ✓              | ✓              |
| MIROC5           | ✓           | ✓              | ✓              | ✓              |
| MIROC-ESM        | ✓           | ✓              | ✓              | ✓              |
| MIROC-ESM-CHEM   | ✓           | ✓              | ✓              | ✓              |
| MPI-ESM-LR       | ✓           | ✓              | ✓              | ✓              |
| MPI-ESM-MR       | ✓           | ✓              | ✓              | ✓              |
| MRI-ESM1         | ✓           | ✓              | ✓              | ✓              |
| NorESM1-M        | ✓           | ✓              | ✓              | ✓              |
| NorESM1-ME       | ✓           | ✓              | ✓              | ✓              |

**Supplementary Table 2: BMA weights of GCM models**

| <b>GCM Model</b> | <b>TOT<sub>P</sub></b> | <b>TOT<sub>E</sub></b> | <b>AE<sub>P</sub></b> | <b>AE<sub>E</sub></b> |
|------------------|------------------------|------------------------|-----------------------|-----------------------|
| bcc-csm1-1       | 0.035                  | 0.042                  | 0.043                 | 0.047                 |
| bcc-csm1-1-m     | 0.052                  | 0.040                  | 0.050                 | 0.050                 |
| BNU-ESM          | 0.052                  | 0.051                  | 0.060                 | 0.050                 |
| CanESM2          | 0.059                  | 0.069                  | 0.056                 | 0.049                 |
| CCSM4            | 0.036                  | 0.039                  | 0.041                 | 0.049                 |
| CESM1-CAM5       | 0.046                  | 0.043                  | 0.054                 | 0.049                 |
| CNRM-CM5         | 0.042                  | 0.045                  | 0.041                 | 0.048                 |
| CSIRO-Mk3-6-0    | 0.018                  | 0.022                  | 0.039                 | 0.042                 |
| FIO-ESM          | 0.081                  | 0.066                  | 0.055                 | 0.047                 |
| GISS-E2-H        | 0.044                  | 0.064                  | 0.036                 | 0.043                 |
| HADGEM2-ES       | 0.044                  | 0.064                  | 0.036                 | 0.042                 |
| IPSL-CM5A-LR     | 0.044                  | 0.030                  | 0.044                 | 0.049                 |
| IPSL-CM5A-MR     | 0.043                  | 0.030                  | 0.043                 | 0.049                 |
| MIROC5           | 0.041                  | 0.037                  | 0.052                 | 0.049                 |
| MIROC-ESM        | 0.060                  | 0.057                  | 0.060                 | 0.048                 |
| MIROC-ESM-CHEM   | 0.061                  | 0.057                  | 0.059                 | 0.048                 |
| MPI-ESM-LR       | 0.051                  | 0.065                  | 0.052                 | 0.053                 |
| MPI-ESM-MR       | 0.050                  | 0.035                  | 0.047                 | 0.048                 |
| MRI-ESM1         | 0.048                  | 0.035                  | 0.047                 | 0.049                 |
| NorESM1-M        | 0.050                  | 0.059                  | 0.043                 | 0.048                 |
| NorESM1-ME       | 0.046                  | 0.050                  | 0.043                 | 0.046                 |

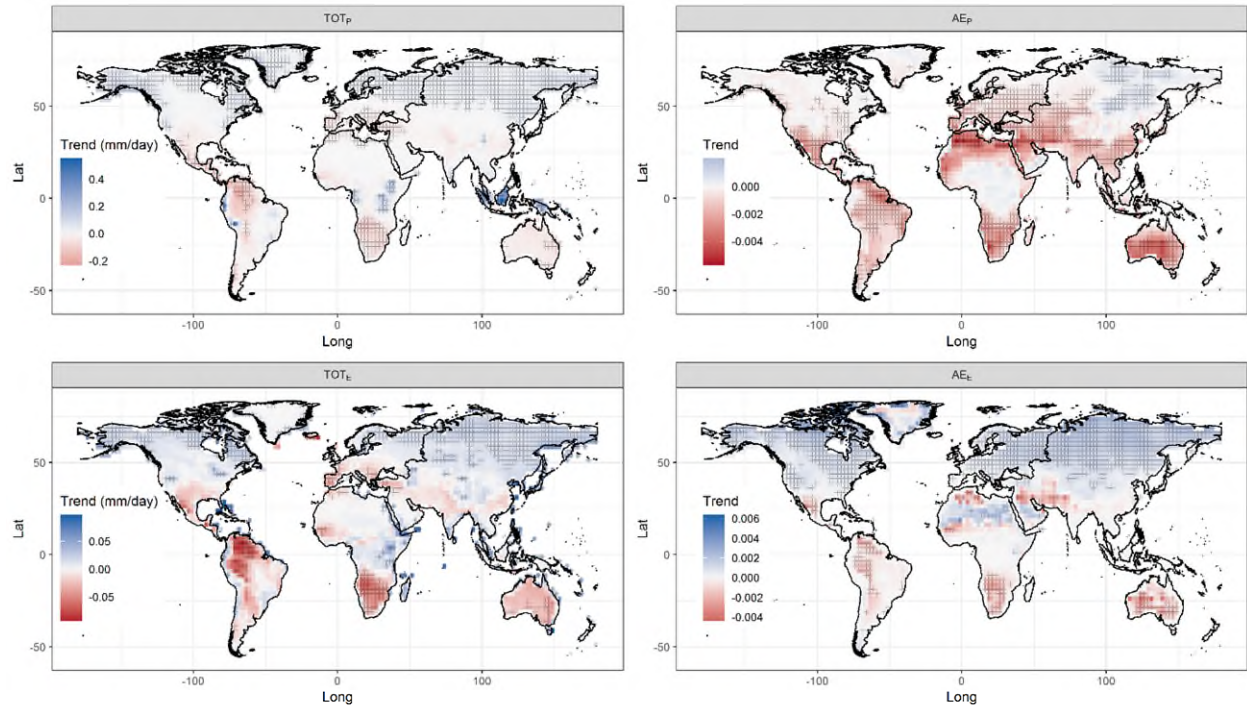

Supplementary Figure 1: **Trends in precipitation and evaporation characteristics: Spatial** Maps of trends in total precipitation (TOTP), AE of precipitation (AEP), total evaporation (TOTE), and AE of evaporation (AEE) in case of RCP 8.5 scenario (2005-2100). Linear trends are estimated using Theil-Sen estimator as described in the main text. The stippling indicates statistically significant ( $p$  value  $< 0.05$ ) grids.

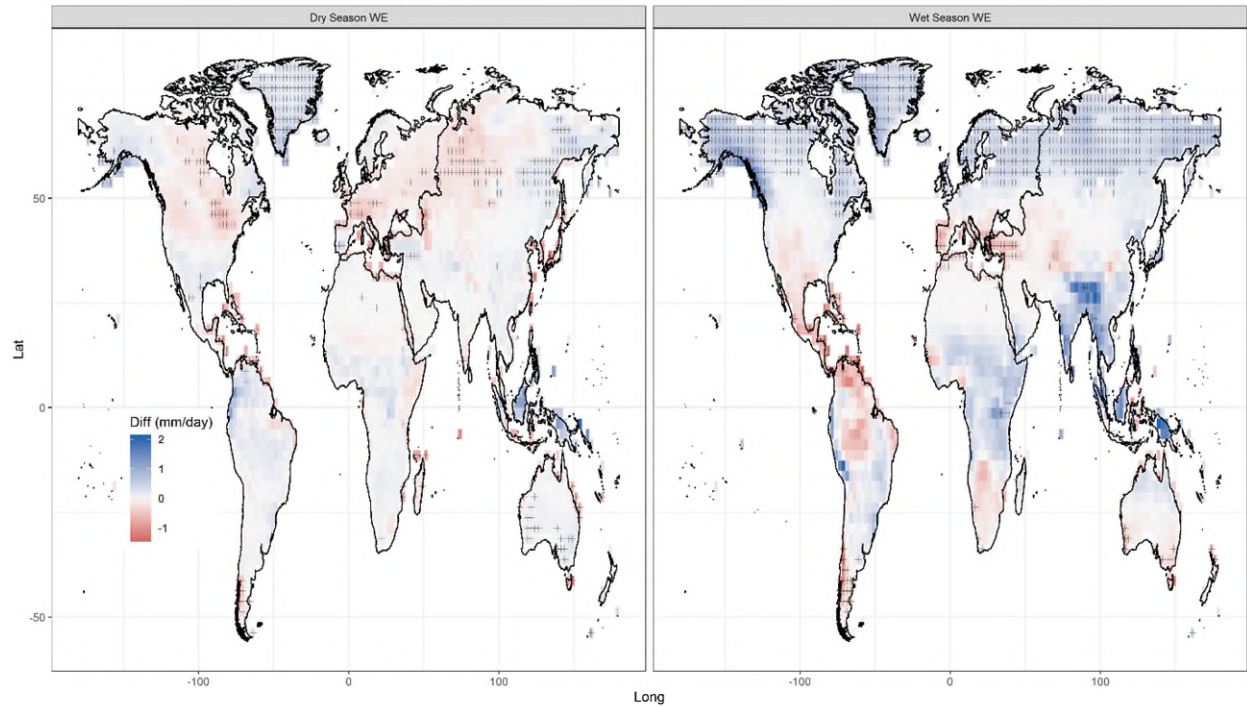

Supplementary Figure 2: **Changes in future projections of available water:** Spatial Maps of wet season and dry season water availability (WA) based on the difference between RCP 8.5 scenario (2070-2100) and historical scenario (1970-2000). The stippling indicates statistically significant ( $p$  value  $< 0.05$ ) grids.
